# Supplementary material
Source: PubMed Central journal article supplement (PMC3780986)
Supplement: NIHMS454102-supplement-1.pdf [file NIHMS454102-supplement-1.pdf]

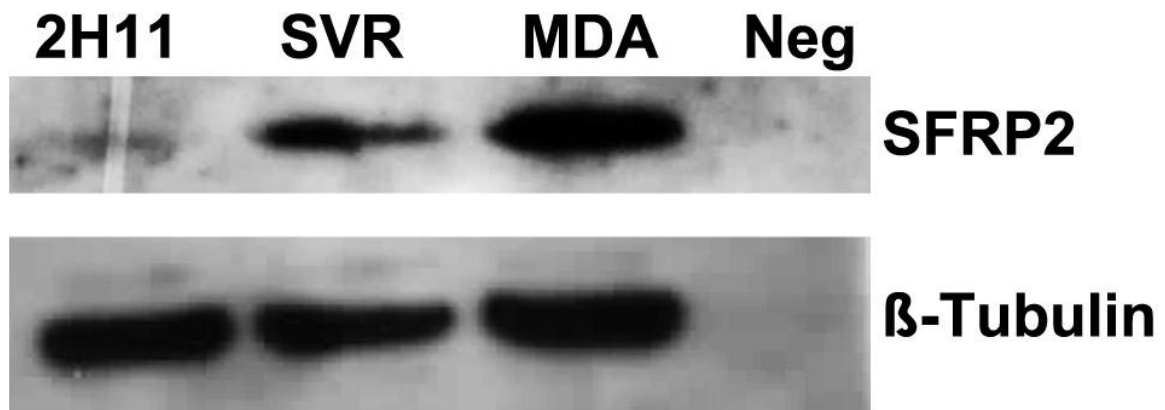

Supplemental Figure 1. Western blot of protein lysates from 2H11 endothelial cells, SVR angiosarcoma cells, MDA-MB-231 breast cancer cells, and negative control media probing for SFRP2.
