# Supplementary material
Source: PubMed Central journal article supplement (PMC3780986)
Supplement: NIHMS454102-supplement-2.pdf [file NIHMS454102-supplement-2.pdf]

## UNC68-80.8.6 Production Media Activity

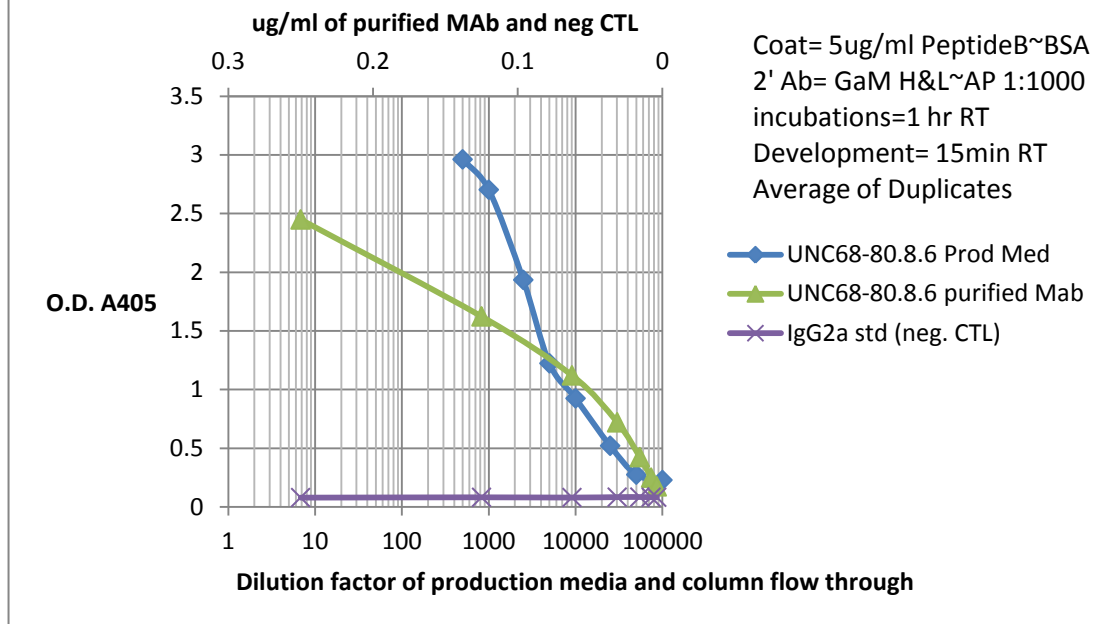

Supplemental Figure 2. Activity ELISA for the purified monoclonal antibody to SFRP2 for “Peptide B”. The production material and purified antibody have a positive reaction, whereas the IgG2a negative control is completely negative.
