# Supplementary material
Source: PubMed Central journal article supplement (PMC3780986)
Supplement: NIHMS454102-supplement-3.pdf [file NIHMS454102-supplement-3.pdf]

Mouse      Human  
SFRP2      SFRP2

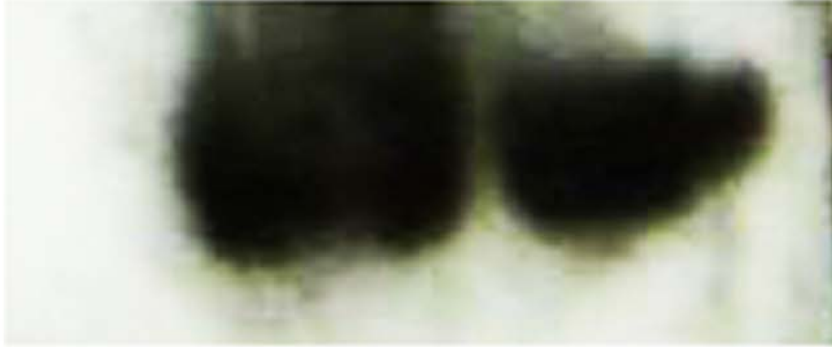

IB: SFRP2  
MAb 80.8.6

Supplemental Figure 3. SFRP2 MAb binds to both human and mouse recombinant SFRP2 protein. Mouse and human recombinant SFRP2 protein were loaded on a gel and probed with SFRP2 MAb 80.8.6, which demonstrates the antibody binds to SFRP2 protein from both species.
