# Supplementary material
Source: PubMed Central journal article supplement (PMC3780986)

## Endothelial

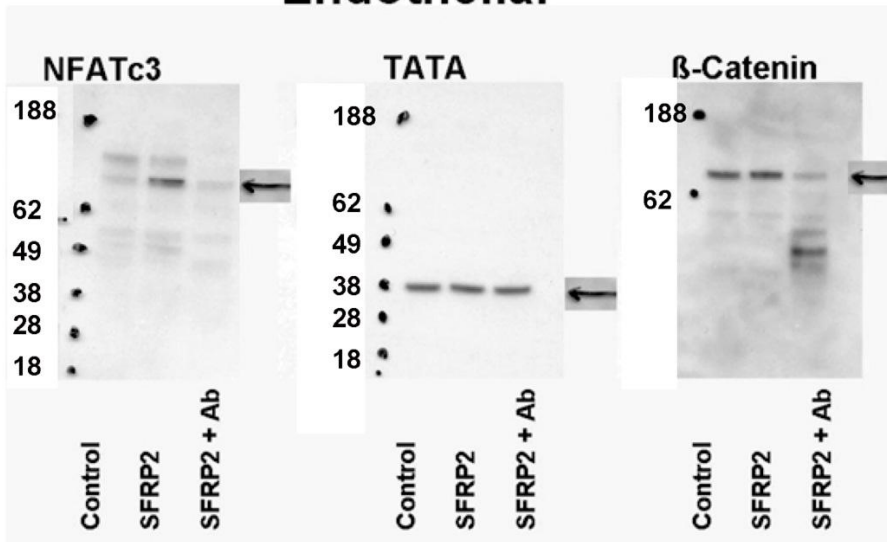

Supplemental Figure 4.  
Full length gels from Western blots shown in Figure 3.

## Breast Cancer

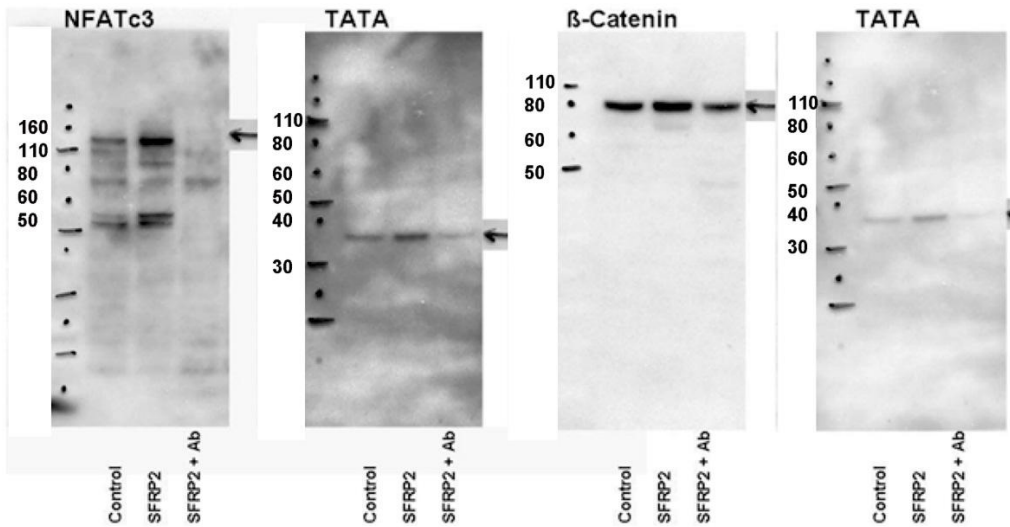

## Angiosarcoma

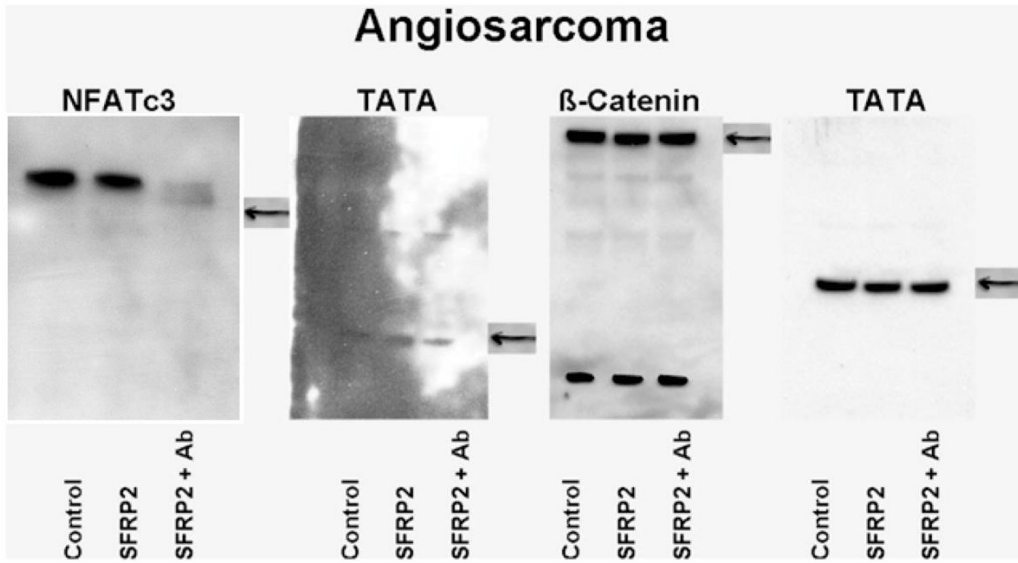

Supplement: NIHMS454102-supplement-4.pdf [file NIHMS454102-supplement-4.pdf]
